# Supplementary material for: Direct conversion of methane to methanol on boron nitride-supported copper single atoms
Source: Royal Society of Chemistry journal article supplement (doi:10.1039/d1nr08466f), 2022-01-01
Supplement: d1nr08466f1.pdf [file d1nr08466f1.pdf]

## **Direct conversion of methane to methanol on boron nitride-supported copper single atoms**

*Sanmei Wang,<sup>a,c</sup> Yue Xin,<sup>a</sup> Jinyun Yuan,<sup>\*b</sup> Liangbing Wang<sup>\*a</sup> and Wenhua Zhang<sup>\*c</sup>*

*a. State Key Laboratory for Powder Metallurgy, School of Materials Science and Engineering, Central South University, Changsha, Hunan 410083, P. R. China. E-mail: wanglb@csu.edu.cn*

*b. School of Material and Chemical Engineering, Zhengzhou University of Light Industry, Zhengzhou, Henan, 450002, China. E-mail: yuanjinyun0916@iccas.ac.cn*

*c. Hefei National Laboratory for Physical Sciences at the Microscale and Synergetic Innovation Centre of Quantum Information & Quantum Physics, University of Science and Technology of China, Hefei, Anhui 230026, P. R. China. E-mail: whhzhang@ustc.edu.cn*

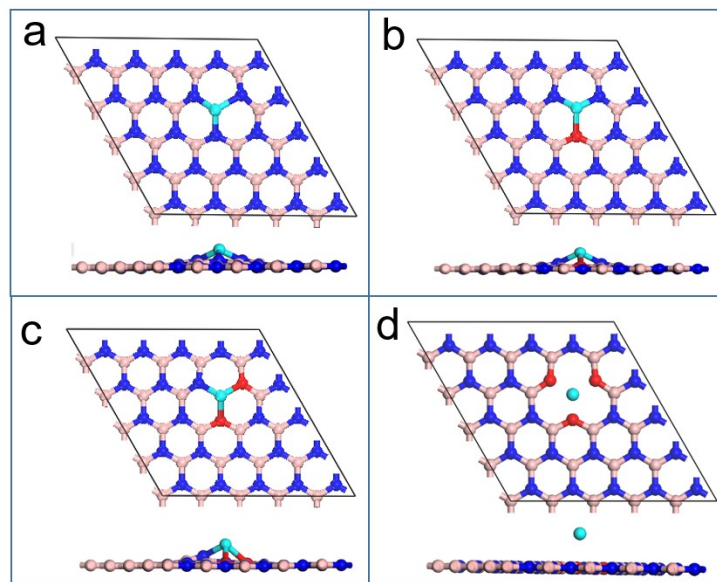

**Fig. S1** Optimized structures for Cu-embedded into (a)  $N_3$ -BN substrate ( $Cu_1/N_3$ -BN), (b)  $O_1N_2$ -BN substrate ( $Cu_1/O_1N_2$ -BN), (c)  $O_2N_1$ -BN substrate ( $Cu_1/O_2N_1$ -BN), and (d)  $O_3$ -BN substrate ( $Cu_1/O_3$ -BN). The light blue, dark blue, bright red, and pink spheres represented Cu, N, O, and B atoms, respectively.

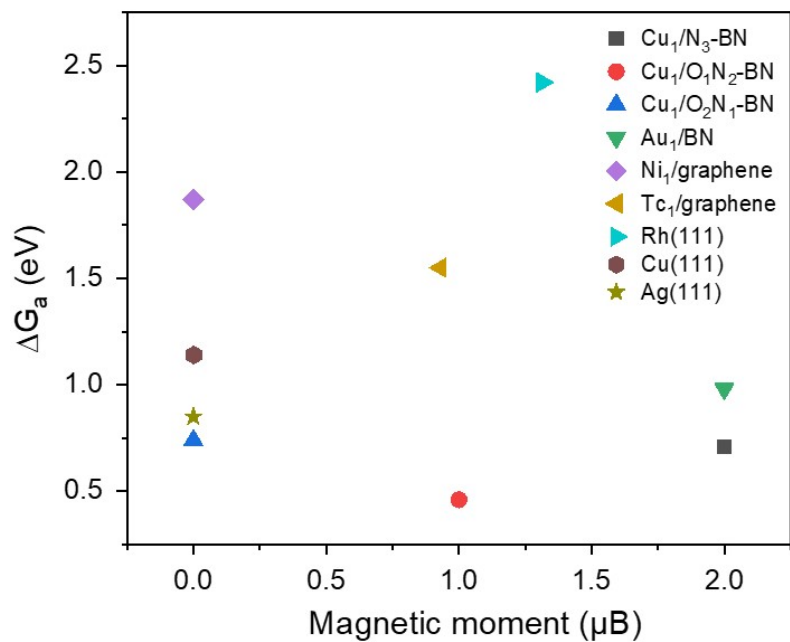

**Fig. S2** The relationship between the magnetic moment and the free energy barriers of  $\text{CH}_4$  activation was not a volcano curve.

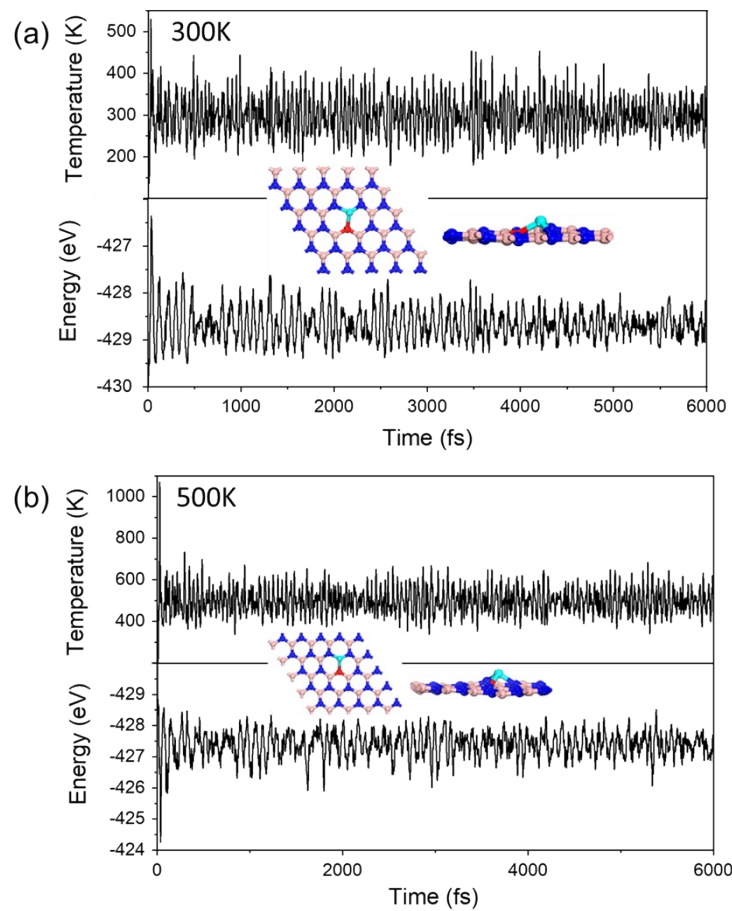

**Fig. S3** The calculated ab initio MD to investigate the stability of  $\text{Cu}_1/\text{O}_1\text{N}_2\text{-BN}$ . Variations of temperature and energy at (a) 300K and (b) 500K, insert are top and side views of the snapshot of atomic configuration. Each simulation lasts 6 ps, and the time-step was set as 1 fs.

## The calculation for the production rate of CH<sub>3</sub>OH and CH<sub>2</sub>

According to the reaction for generating CH<sub>3</sub>OH and CH<sub>2</sub>,

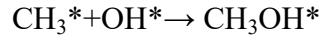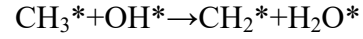

the  $r_{\text{CH}_3\text{OH}}$  and  $r_{\text{CH}_2}$  were calculated according to Eq. S2 and S3, respectively.

$$r_{\text{CH}_3\text{OH}} = k_{\text{CH}_3\text{OH}} C_{\text{CH}_3^*} C_{\text{OH}^*} \quad (\text{S1})$$

$$r_{\text{CH}_2} = k_{\text{CH}_2} C_{\text{CH}_3^*} C_{\text{OH}^*} \quad (\text{S2})$$

where  $C_{\text{CH}_3^*}$  and  $C_{\text{OH}^*}$  denoted the concentration of intermediates CH<sub>3</sub>\* and OH\*, respectively. The ratio of CH<sub>3</sub>OH production rate to CH<sub>2</sub> production rate was

$\frac{r_{\text{CH}_3\text{OH}}}{r_{\text{CH}_2}} = \frac{k_{\text{CH}_3\text{OH}}}{k_{\text{CH}_2}}$ . The production rate of CH<sub>3</sub>OH was determined to be  $1.81 \times 10^6$  times than

that of CH<sub>2</sub> species at room temperature, indicating the negligible production of CH<sub>2</sub> species relative to CH<sub>3</sub>OH.

## Stability of Cu<sub>1</sub>/O<sub>1</sub>N<sub>2</sub>-BN catalyst

In addition, we also calculated the formation energy of Cu atoms embedded in O<sub>1</sub>N<sub>2</sub>-BN substrate to further determine the stability of Cu<sub>1</sub>/O<sub>1</sub>N<sub>2</sub>-BN. The formation energy was calculated by equation (1):

$$E_f = E_{\text{Cu}_1/\text{O}_1\text{N}_2\text{-BN}} - E_{\text{O}_1\text{N}_2\text{-BN}} - E_{\text{Cu}}$$

Where  $E_{\text{Cu}_1/\text{O}_1\text{N}_2\text{-BN}}$ ,  $E_{\text{O}_1\text{N}_2\text{-BN}}$ , and  $E_{\text{Cu}}$  were the energies of Cu<sub>1</sub>/O<sub>1</sub>N<sub>2</sub>-BN, O<sub>1</sub>N<sub>2</sub>-BN substrate, Cu single atoms in its bulk form, respectively. The formation energy was determined to be -0.74 eV, indicating that the structure for Cu atoms embedded in O<sub>1</sub>N<sub>2</sub>-BN substrate via two O-Cu and one N-Cu coordination were stable.

**Table S1** DFT-calculated activation energies of CH<sub>4</sub> and adsorption free energy of \*O atoms. Structures taken from Ref.<sup>S1</sup> and Ref.<sup>S2</sup> was indicated by ‡ and \*, respectively, and we recalculated the activation energies of CH<sub>4</sub> for these structures. All values were in eV.

| Catalyst        | Catalyst Type                     | $\Delta G_{\text{ads}}(*\text{O})$ | $\Delta G_{\text{a}}(\text{CH}_4)$ |
|-----------------|-----------------------------------|------------------------------------|------------------------------------|
| Cu              | O <sub>2</sub> N <sub>1</sub> -BN | -0.80                              | 0.74                               |
| Cu              | O <sub>1</sub> N <sub>2</sub> -BN | -0.15                              | 0.46                               |
| Cu              | BN                                | 0.13                               | 0.71                               |
| Au <sup>‡</sup> | BN                                | -0.90                              | 0.98                               |
| Ni <sup>*</sup> | graphene                          | -2.01                              | 1.87                               |
| Tc <sup>‡</sup> | graphene                          | -2.15                              | 1.55                               |
| Rh <sup>‡</sup> | metal-111                         | -2.77                              | 2.42                               |
| Cu <sup>‡</sup> | metal-111                         | -1.61                              | 1.14                               |
| Ag <sup>‡</sup> | metal-111                         | -0.56                              | 0.85                               |

## Synthesis of Cu<sub>1</sub>/O<sub>1</sub>N<sub>2</sub>-BN catalyst

A feasible synthesis method of Cu<sub>1</sub>/O<sub>1</sub>N<sub>2</sub>-BN catalyst was proposed by calculation, as illustrated in Fig. S4†. Cu<sub>1</sub>/O<sub>1</sub>N<sub>2</sub>-BN catalyst can be prepared by Cu-modified h-BN where a Cu atom bonded with two unsaturated nitrogen (N) atoms and two boron (B) atoms (named as Cu<sub>1</sub>/BN) at the presence of H<sub>2</sub>O<sub>2</sub>. A H<sub>2</sub>O<sub>2</sub> was adsorbed on Cu<sub>1</sub>/BN with  $G_{\text{ads}}$  of 0.21 eV. And then the H<sub>2</sub>O<sub>2</sub> was decomposed on Cu<sub>1</sub>/BN through the breakage of O-O bonds or O-H bonds.

The  $\Delta G_a$  for the breakage of the O-O bond to form two OH species ( $*\text{H}_2\text{O}_2 \rightarrow 2*\text{OH}$ ) was calculated to be 0.44 eV, obviously lower than that of the O-H bond breakage to form OOH species and H species (1.08 eV,  $*\text{H}_2\text{O}_2 \rightarrow *\text{OOH} + *\text{H}$ ). Thus, the breakage of O-O bonds were more dynamically favorable than the O-H bond breakage on Cu<sub>1</sub>/BN. These two  $*\text{OH}$  species further combined with each other to form a H<sub>2</sub>O molecule and a lattice O with  $\Delta G_a$  of 0.79 eV. After the adsorbed H<sub>2</sub>O released from the surface of Cu<sub>1</sub>/O<sub>1</sub>N<sub>2</sub>-BN, Cu<sub>1</sub>/O<sub>1</sub>N<sub>2</sub>-BN catalyst was fabricated.

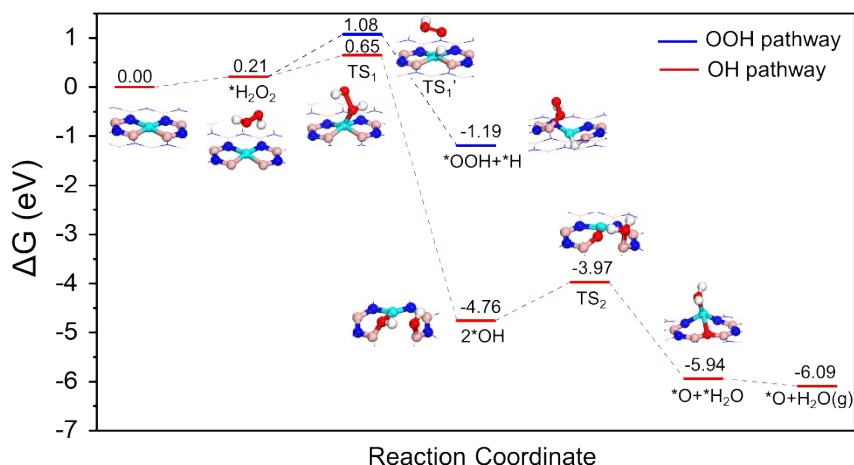

**Fig. S4** Free energy diagrams for the decomposition of H<sub>2</sub>O<sub>2</sub> over Cu<sub>1</sub>/BN. TS represented the transition states. The gray, white, light blue, dark blue, bright red, and pink spheres represented C, H, Cu, N, O, and B atoms, respectively.



## Reference

S1 A. A. Latimer, A. Kakekhani, A. R. Kulkarni and J. K. Nørskov, *ACS Catal.*, 2018, 8, 6894–6907.

S2 S. M. Wang, Y. Xin, W. H. Zhang and L.B. Wang, *Catal. Lett.*, DOI:10.1007/s10562-021-03742-1.
